# Supplementary material for: Structure‐Activity Relationship of NF023 Derivatives Binding to XIAP‐BIR1
Source: PubMed Central journal article supplement — ChemistryOpen. 2019 Apr 12;8(4):476–82. doi: 10.1002/open.201900059 (PMC6460348; doi:10.1002/open.201900059), 2019-04-12

# Supporting Information

© Copyright Wiley-VCH Verlag GmbH & Co. KGaA, 69451 Weinheim, 2019

## **Structure-Activity Relationship of NF023 Derivatives Binding to XIAP-BIR1**

Luca Sorrentino<sup>+</sup>, Federica Cossu<sup>+</sup>, Mario Milani, Bilge Malkoc, Wen-Chieh Huang, Shwu-Chen Tsay, Jih Ru Hwu,\* and Eloise Mastrangelo\*©2019 The Authors. Published by Wiley-VCH Verlag GmbH & Co. KGaA.

This is an open access article under the terms of the Creative Commons Attribution Non-Commercial NoDerivs License, which permits use and distribution in any medium, provided the original work is properly cited, the use is non-commercial and no modifications or adaptations are made.

**Author Contributions**

L.S. Conceptualization:Equal; Data curation:Lead; Methodology:Equal

## Experimental Section

Infrared spectra (IR) were measured on a Fourier transform infrared spectrometer (FT-IR). Absorption intensities are recorded by the following abbreviations: s, strong; m, medium; and w, weak. Proton NMR spectra were obtained on a Varian Mercury-400 (400 MHz) or a Bruker AV-400 (400 MHz) spectrometer by use of dimethylsulfoxide- $d_6$  as the solvent. Carbon-13 NMR spectra were obtained on a Varian Mercury-400 (100 MHz) or a Bruker AV-400 (100 MHz) spectrometer. The residual solvent peaks,  $\delta_{\text{H}}$  2.50 ppm and  $\delta_{\text{C}}$  39.5 ppm for DMSO- $d_6$ , were used as references. Multiplicities are recorded by the following abbreviations: s, singlet; d, doublet; t, triplet; q, quartet; m, multiplet;  $J$ , coupling constant (hertz). High-resolution mass spectra were obtained by means of a VARIAN-901 mass spectrometer.

### ***Tatrasodium 4,4'-Carbonylbis(imino)bis-1,5-naphthalenedisulphonate (3).***

mp (recrystallized from H<sub>2</sub>O/EtOH) 193.6–194.2 °C; <sup>1</sup>H NMR (DMSO- $d_6$ , 400 MHz)  $\delta$  8.80 (d,  $J$  = 8.0 Hz, 2 H, H-2), 8.05 (d,  $J$  = 8.0 Hz, H-3), 7.65 (d,  $J$  = 8.4 Hz, 2 H, ArH), 7.22 (t,  $J$  = 8.0 Hz, 2 H, H-7), 7.07 (s, 2 H, NH), 6.45 (d,  $J$  = 8.4 Hz, 2 H, ArH); <sup>13</sup>C NMR (DMSO- $d_6$ , 100 MHz)  $\delta$  154.79 (C=O), 147.18, 143.20, 132.48, 130.52, 129.89, 126.44, 124.69, 122.92, 118.40, 107.36; IR (KBr) 3087 (w), 2989 (w), 1580 (s, C=O), 1423 (s), 1189 (m), 1042 (s), 835 (s) cm<sup>-1</sup>; UV (Water):  $\lambda_{\text{max}}$  253 ( $\epsilon$  11,804), 216 ( $\epsilon$  11,720), 342 ( $\epsilon$  5,171); HRMS (ESI)  $m/z$  [M + H]<sup>+</sup> calcd for C<sub>21</sub>H<sub>12</sub>N<sub>2</sub>Na<sub>4</sub>O<sub>13</sub>S<sub>4</sub> + H 720.8891, found 720.8896.

### ***Tatrasodium 4,4'-[Carbonylbis(imino-3,1-phenylenecarbonylimino)]bis-1,5-naphthalenedisulphonate (5a).***

mp (recrystallized from H<sub>2</sub>O/EtOH) 220.2–220.6 °C; <sup>1</sup>H NMR (DMSO- $d_6$ , 400 MHz)  $\delta$  12.54 (s, 2 H, NH), 10.55 (s, 2 H, NH), 9.10 (d,  $J$  = 8.8 Hz, 2 H, ArH), 8.29 (d,  $J$  = 8.8 Hz, 2 H, ArH), 8.07–8.01 (m, 6 H, ArH), 7.83–7.79 (m, 4 H, ArH), 7.45 (t,  $J$  = 8.8 Hz, 2 H, ArH), 7.35 (t,  $J$  = 8.0 Hz, 2 H, ArH); <sup>13</sup>C NMR (DMSO- $d_6$ , 100 MHz)  $\delta$  165.70 (C=O), 153.17 (C=O), 141.71, 140.98, 140.28, 136.21, 134.53, 131.57, 130.70, 128.21, 127.04, 124.57, 123.48, 123.45, 122.39, 120.88, 120.68, 118.11; IR (KBr) 3355 (br, NH), 2919 (m), 1652 (m, C=O), 1575 (s), 1545 (s), 1524 (s), 1193 (s), 1044 (s), cm<sup>-1</sup>; UV (Water):  $\lambda_{\text{max}}$  234 ( $\epsilon$  11,641), 311 ( $\epsilon$  6,872); HRMS (ESI)  $m/z$  [M + Na]<sup>+</sup> calcd for C<sub>35</sub>H<sub>22</sub>N<sub>4</sub>Na<sub>4</sub>O<sub>15</sub>S<sub>4</sub> + Na 980.9447, found 980.9446.

***Tatrasodium 4,4'-(Carbonylbis[imino-3,1-(4-methylphenylene)carbonylimino])bis-1,5-naphthalenedisulphonate (5b).***

mp (recrystallized from H<sub>2</sub>O/EtOH) 224.4–224.8 °C; <sup>1</sup>H NMR (DMSO-*d*<sub>6</sub>, 400 MHz) δ 12.50 (s, 2 H, NH), 9.09 (s, 2 H, NH), 9.06 (d, *J* = 7.6 Hz, 2 H, ArH), 8.35 (s, 2 H, H-2'), 8.28 (d, *J* = 8.0 Hz, 2 H, ArH), 8.02–8.00 (m, 4 H, ArH), 7.84 (d, *J* = 7.6 Hz, 2 H, ArH), 7.45 (t, *J* = 8.0 Hz, 2 H, H-7), 7.26 (d, *J* = 8.0 Hz, 2 H, ArH), 2.39 (s, 6 H, 2 × CH<sub>3</sub>); <sup>13</sup>C NMR (DMSO-*d*<sub>6</sub>, 100 MHz) δ 165.61 (C=O), 153.32 (C=O), 141.77, 140.82, 137.51, 134.66, 133.74, 132.18, 131.58, 130.69, 129.68, 127.01, 126.90, 124.61, 123.47, 123.42, 122.37, 122.29, 18.48 (CH<sub>3</sub>); IR (KBr) 3354 (br, NH), 3048 (w), 2914 (s), 2848 (m), 1635 (s, C=O), 1575 (m), 1424 (m), 1225 (w) cm<sup>-1</sup>; UV (Water): λ<sub>max</sub> 236 (ε 15,050), 310 (ε 10,288); HRMS (ESI) *m/z* [M + Na]<sup>+</sup> calcd for C<sub>37</sub>H<sub>26</sub>N<sub>4</sub>Na<sub>4</sub>O<sub>15</sub>S<sub>4</sub> + Na 1008.9760, found 1008.9765.

***Disodium 4-(3-[3-(Ethoxylthioimino)benzamido]-4-tolylamido)naphthalene-1,5-disulphonate (9).***

mp (recrystallized from H<sub>2</sub>O/EtOH) 205.4–205.6 °C; <sup>1</sup>H NMR (DMSO-*d*<sub>6</sub>, 400 MHz) δ 8.89 (d, 1 H, *J* = 8.8 Hz, ArH), 8.31 (d, *J* = 8.8 Hz, 1 H, ArH), 7.63 (d, *J* = 7.6 Hz, 1 H, ArH), 7.44 (s, 1 H, ArH), 7.39 (s, 1 H, ArH), 7.30–7.26 (m, 2 H, ArH), 6.88 (t, *J* = 7.6 Hz, 1 H, ArH), 6.67 (d, *J* = 7.6 Hz, 1 H, ArH), 6.60–6.43 (m, 3 H, ArH), 4.11 (q, *J* = 6.8 Hz, 2 H, OCH<sub>2</sub>), 2.05 (s, 3 H, CH<sub>3</sub>), 1.03 (t, *J* = 6.8 Hz, 3 H, CH<sub>3</sub>); <sup>13</sup>C NMR (DMSO-*d*<sub>6</sub>, 100 MHz) δ 183.55 (C=S), 165.65 (C=O), 165.15 (C=O), 147.03, 144.58, 139.99, 136.26, 135.29, 133.62, 131.96, 130.28, 128.98, 127.89, 126.99, 125.64, 125.39, 123.26, 122.78, 122.71, 122.71, 120.10, 118.31, 116.72, 114.62, 113.36, 66.03, 18.53, 14.51; IR (KBr) 3346 (br, NH), 2927 (s), 1646 (s, C=O), 1574 (w), 1544 (m), 1422 (m), 1334 (m), 1227 (m) cm<sup>-1</sup>; HRMS (ESI) *m/z* [M + H]<sup>+</sup> calcd for C<sub>28</sub>H<sub>23</sub>N<sub>3</sub>Na<sub>2</sub>O<sub>9</sub>S<sub>3</sub> + H 688.0470, found 688.0478.

# <sup>1</sup>H-NMR, <sup>13</sup>C-NMR, and IR Spectra as well as HRMS Data of Sodium Organosulfonates 3, 5a, 5b, and 9

## Compound 3

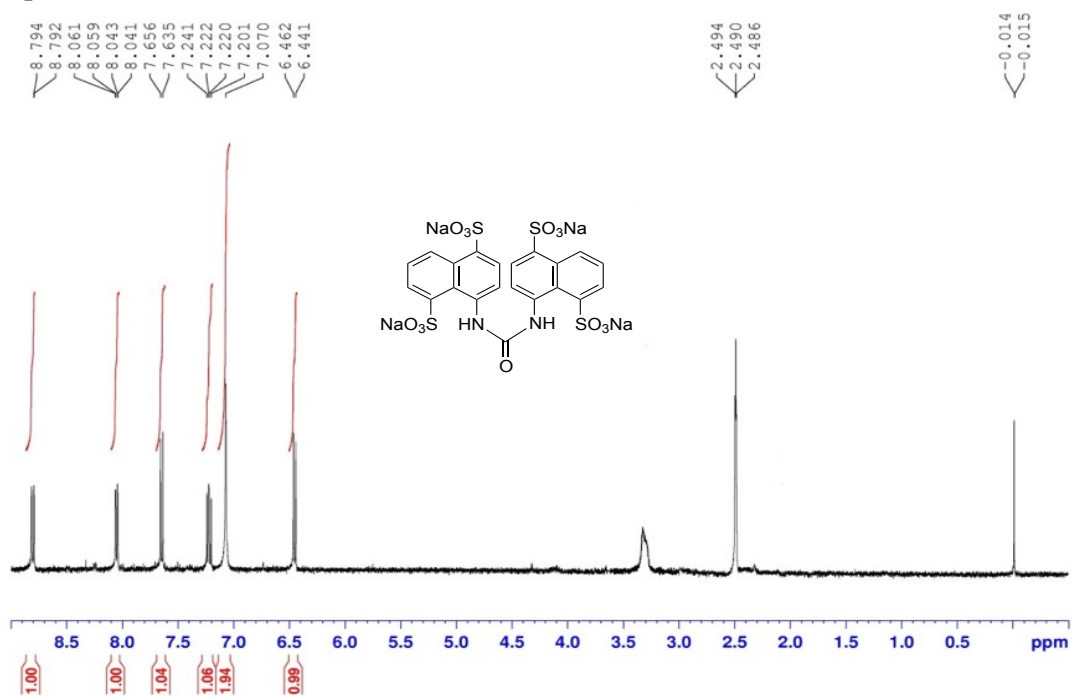

<sup>1</sup>H NMR spectrum of salt 3

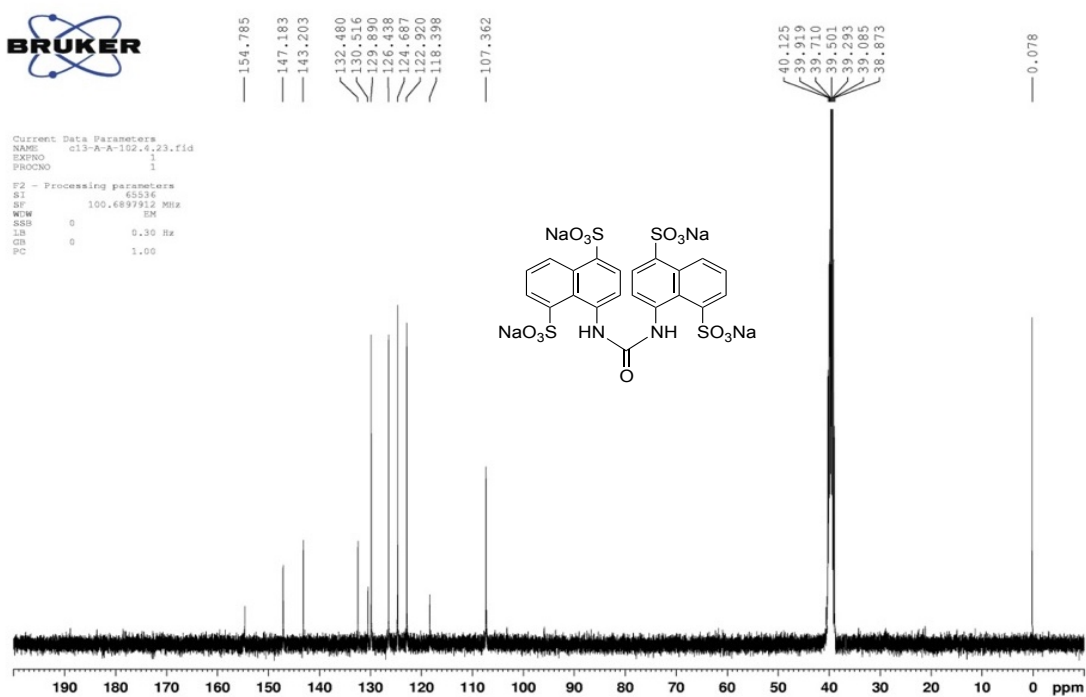

<sup>13</sup>C NMR spectrum of salt 3

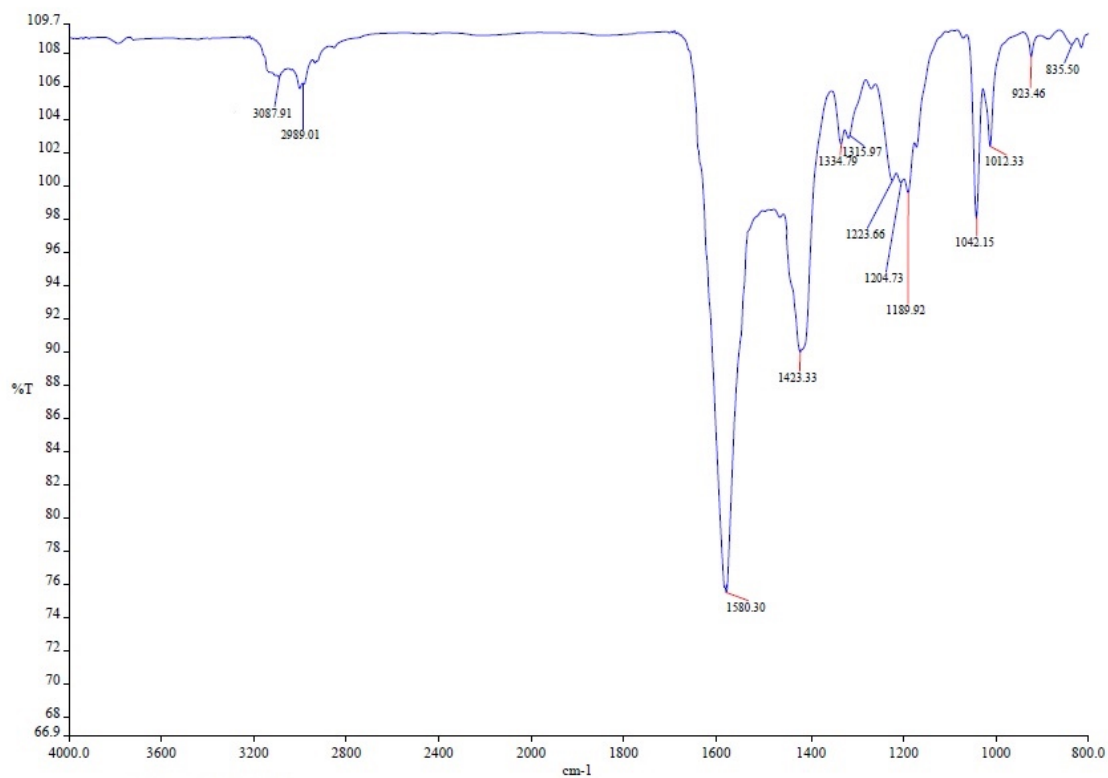

IR Spectrum of salt 3

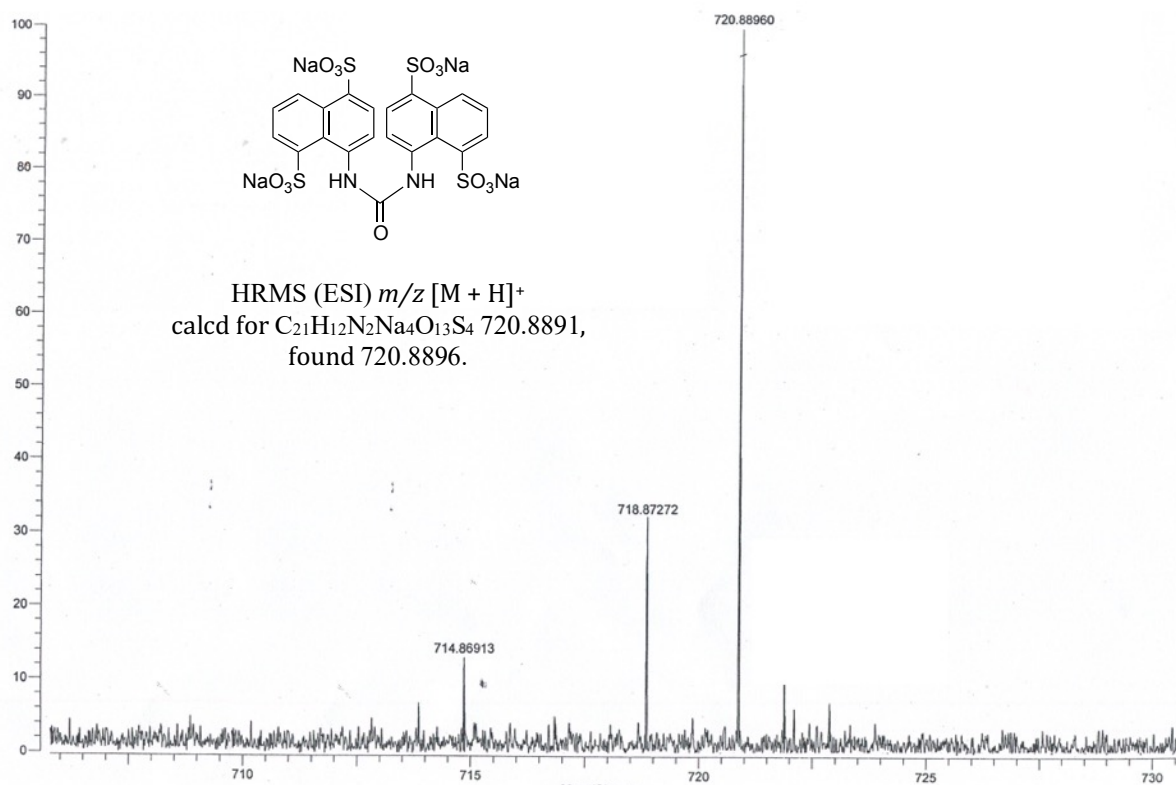

HRMS of salt 3

### Compound 5a

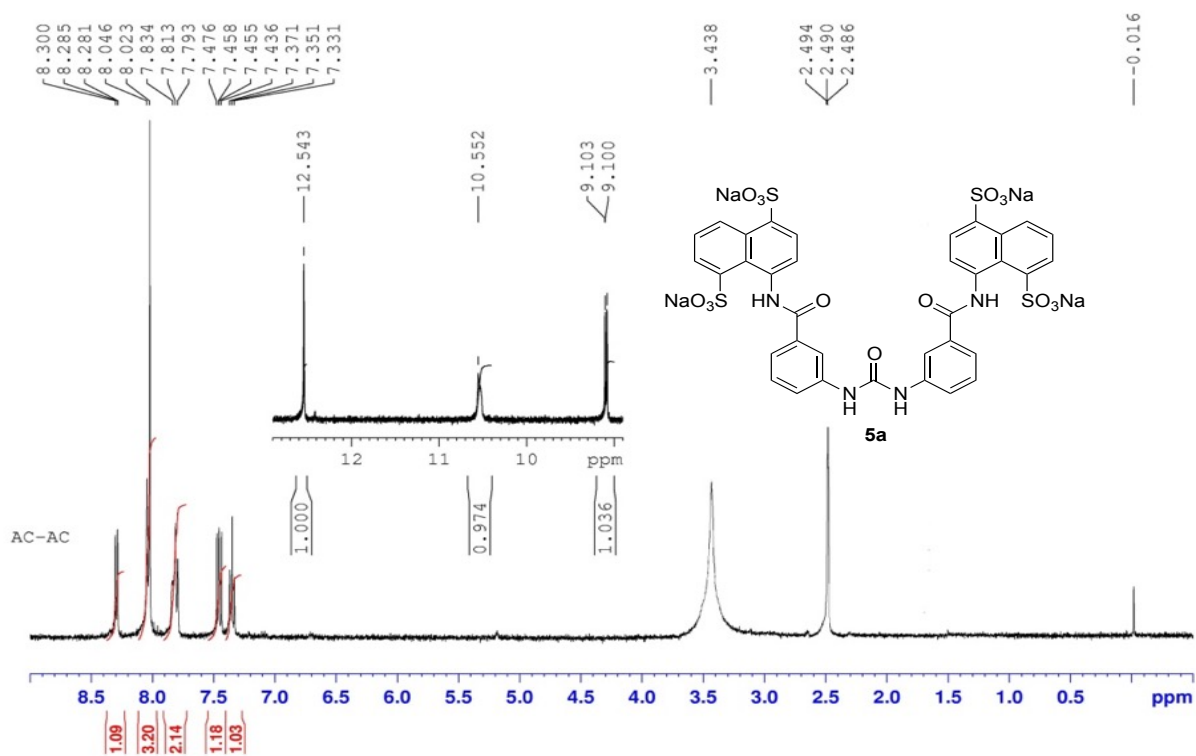

<sup>1</sup>H NMR spectrum of salt **5a**

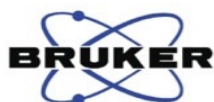

Current Data Parameters  
 NAME c13-AC-AC.fid  
 EXPNO 1  
 PROCNO 1  
 F2 - Processing parameters  
 SI 6536  
 SF 100.627894 MHz  
 WDW EM  
 SSB 0  
 LB 0.30 Hz  
 GB 0  
 PC 1.00

c13- AC-AC

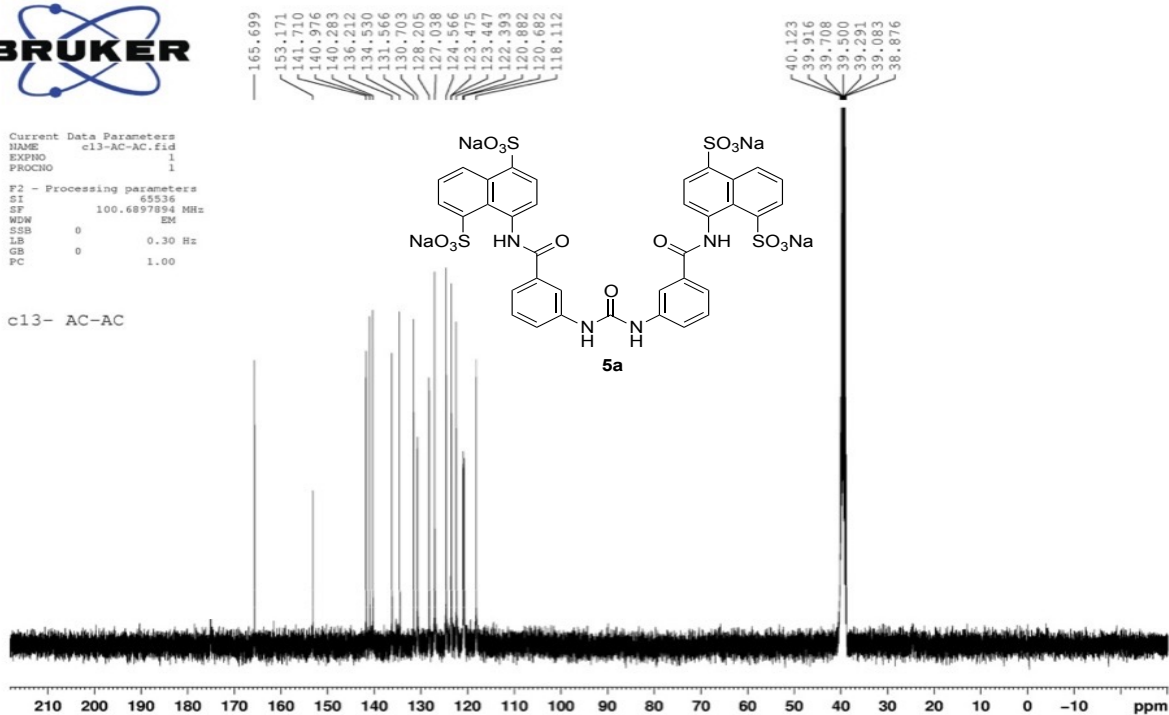

<sup>13</sup>C NMR spectrum of salt **5a**

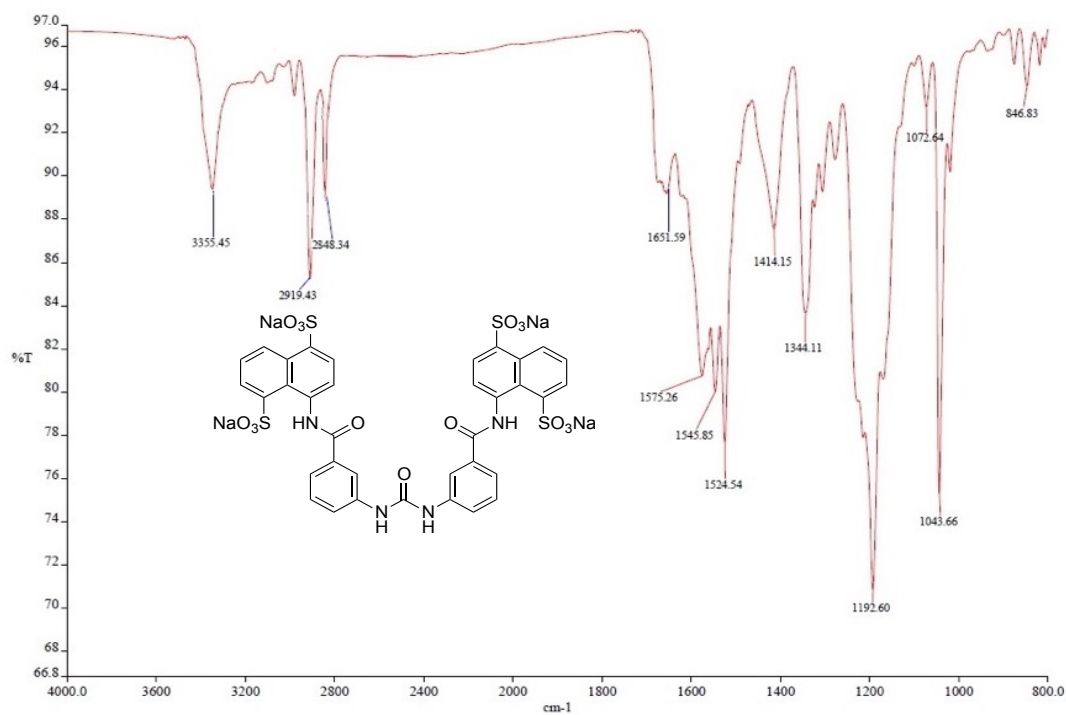

IR Spectrum of salt **5a**

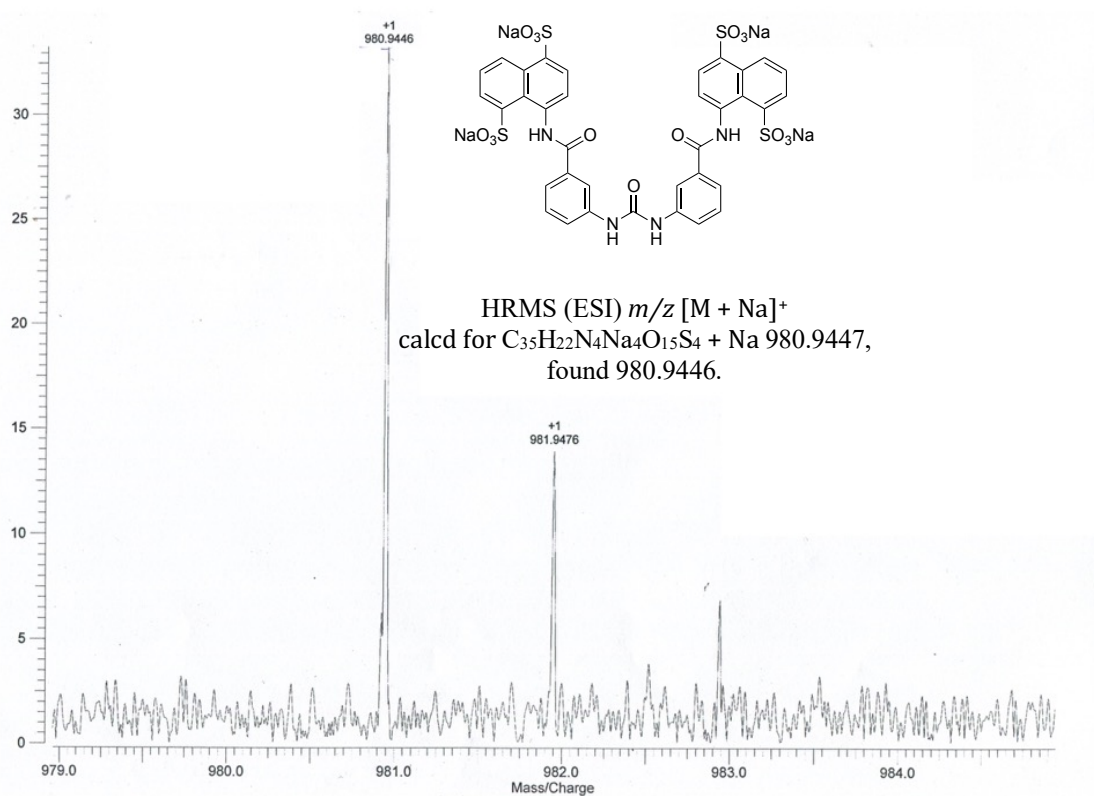

HRMS of salt **5a**



# Compound 5b

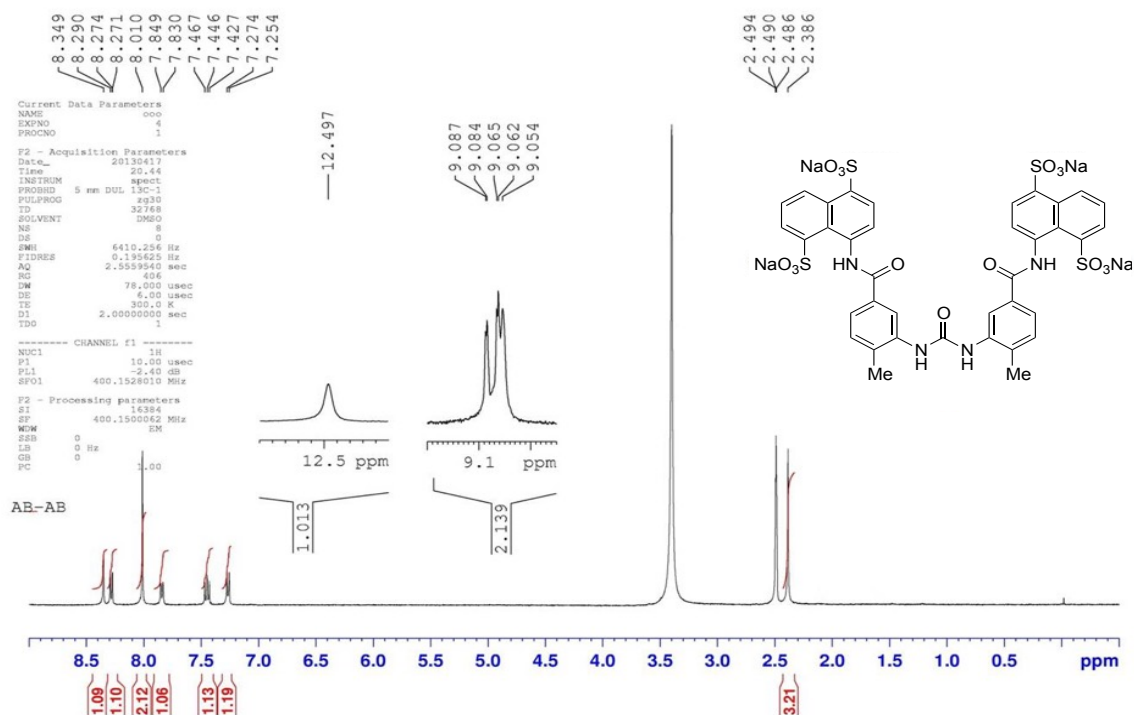

<sup>1</sup>H NMR spectrum of salt 5b

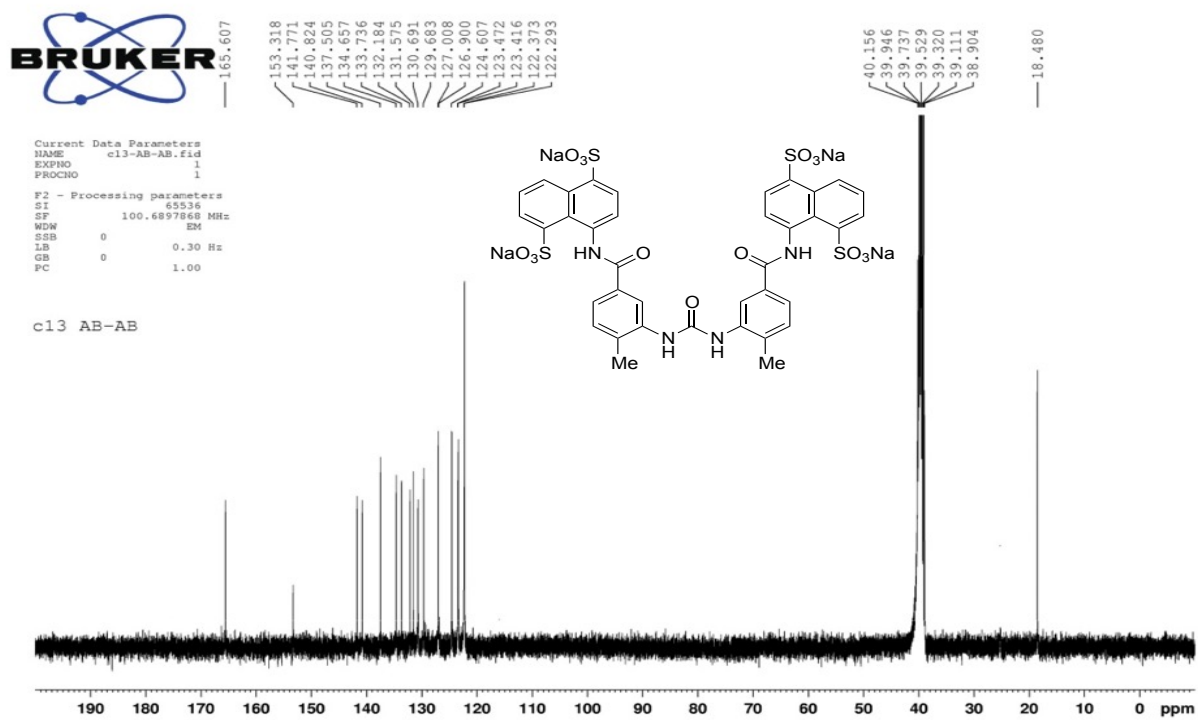

<sup>13</sup>C NMR spectrum of salt 5b

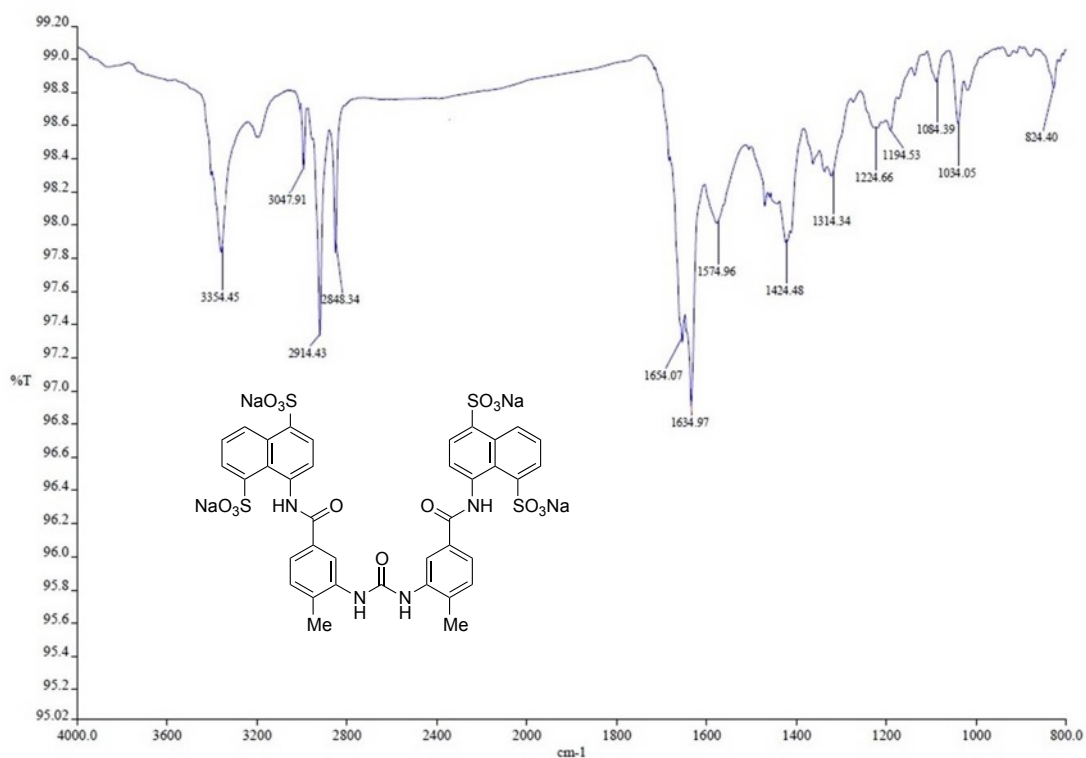

IR Spectrum of salt **5b**

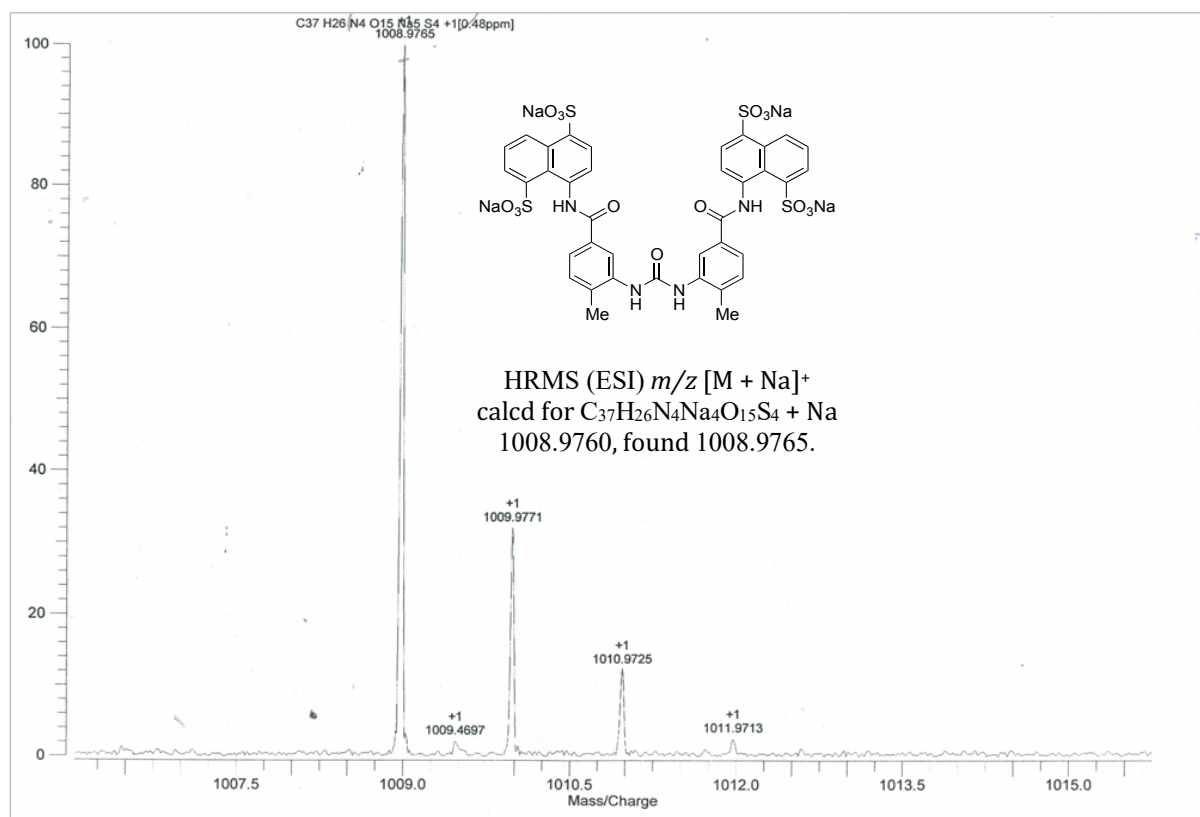

HRMS of salt **5b**

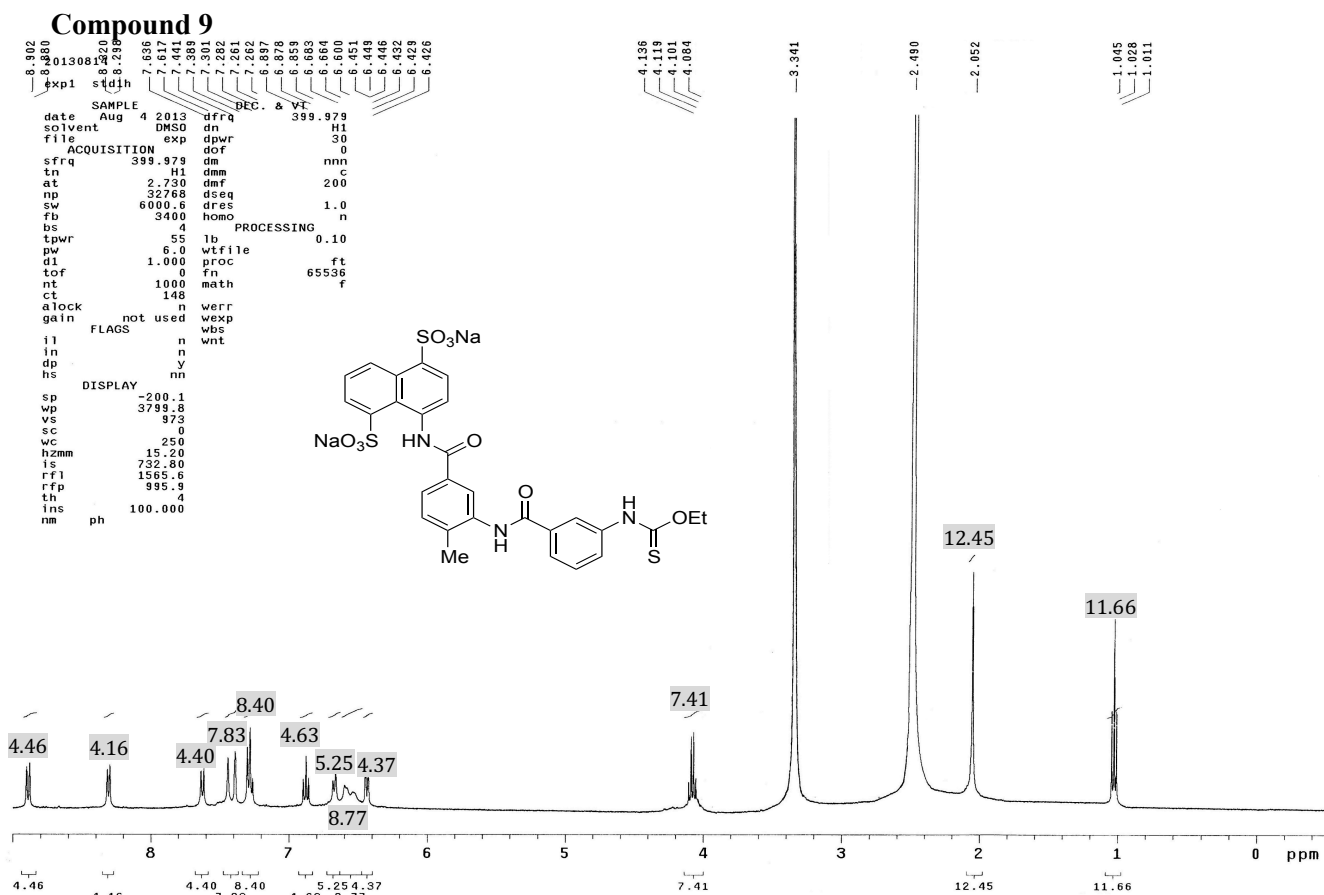

<sup>1</sup>H NMR spectrum of salt 9

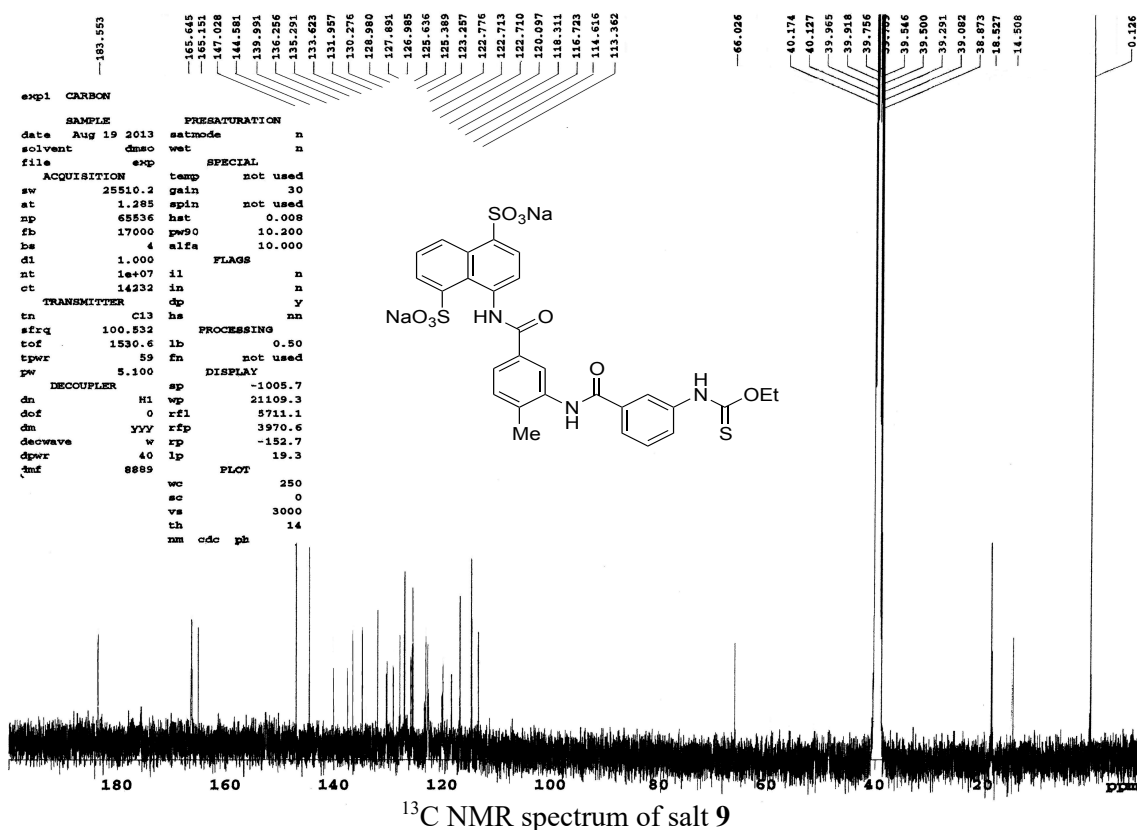

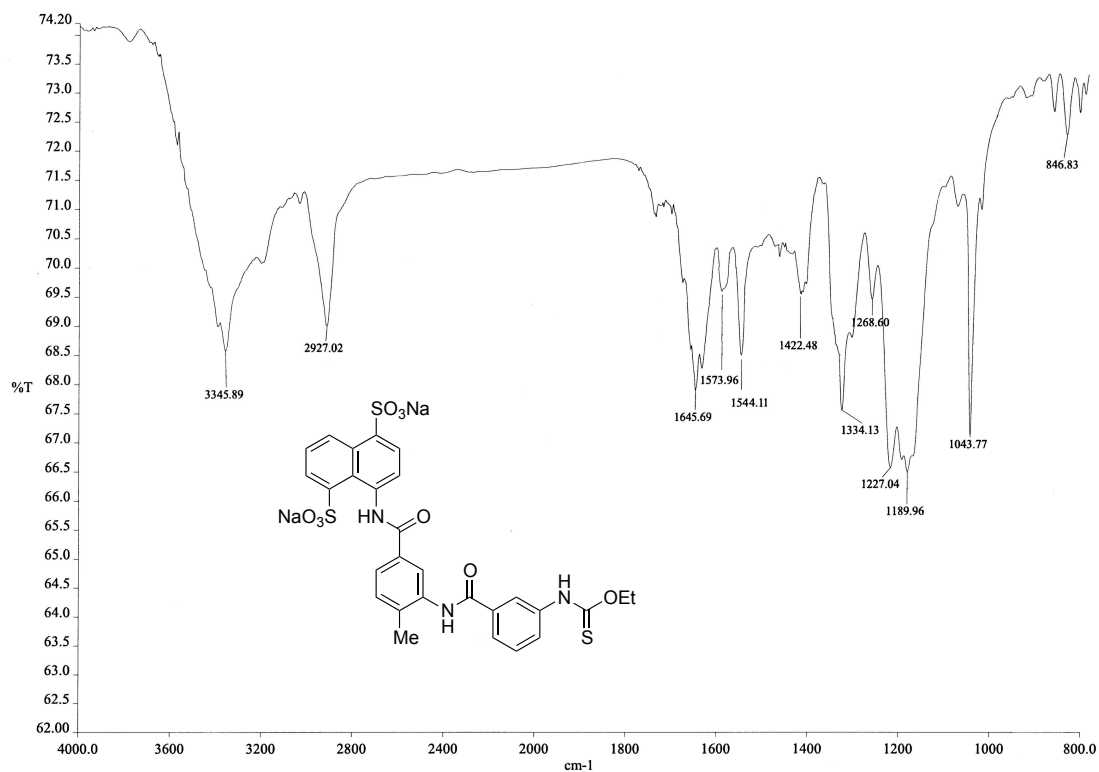

IR spectrum of salt 9

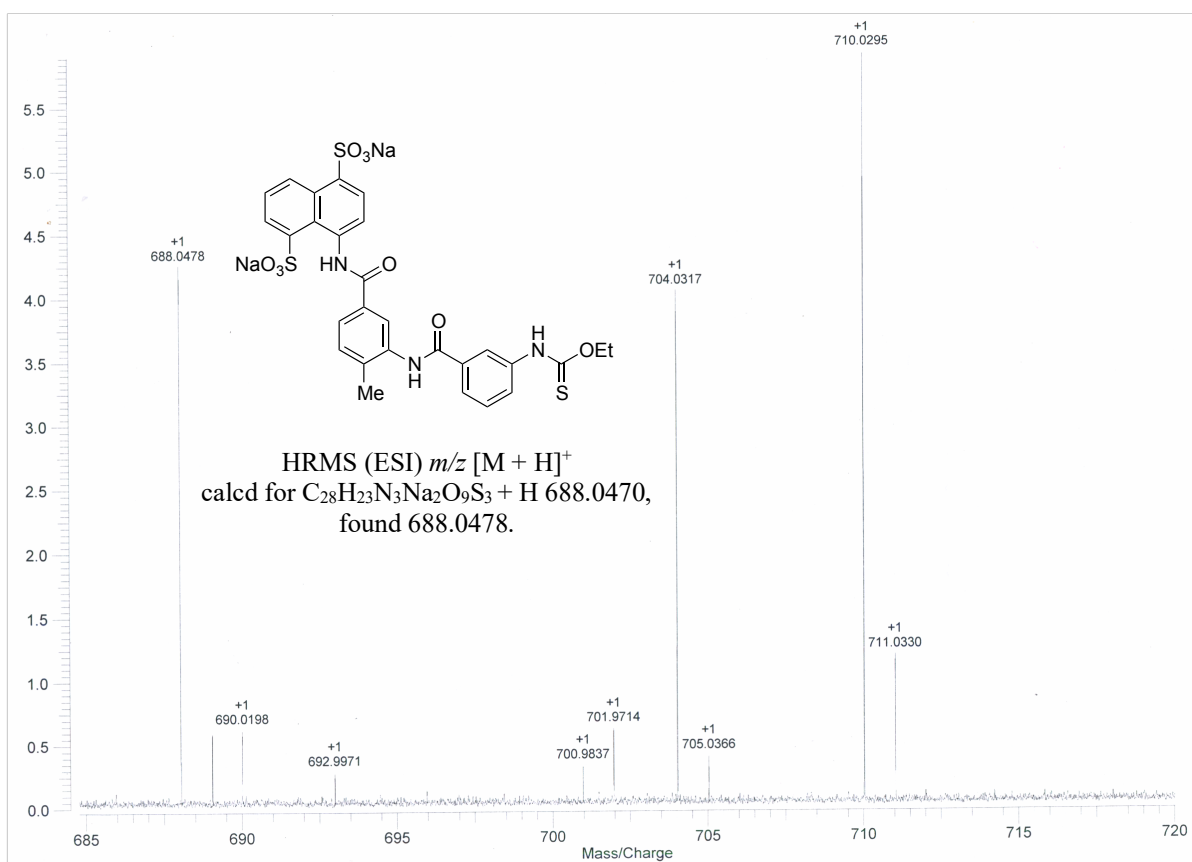

HRMS of salt 9

**Table S1. XIAP-BIR1 thermal stability and affinity for NF023 like molecules moieties.**

| Sample            | Compounds<br>Chemical Structure                                                     | Melting<br>Temperature<br>(°C) | $\Delta T_m$ (°C) <sup>a</sup> |
|-------------------|-------------------------------------------------------------------------------------|--------------------------------|--------------------------------|
| XIAP-BIR1         | /                                                                                   | $63.5 \pm 0.9$                 | /                              |
| XIAP-BIR1/NF023   | 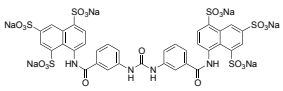   | $56.7 \pm 1.0$                 | -6.8                           |
| XIAP-BIR1/Suramin |    | $50.0 \pm 0.5$                 | -13.5                          |
| XIAP-BIR1/3       |    | $63.0 \pm 0.3$                 | -0.5                           |
| XIAP-BIR1/5a      |   | $56.2 \pm 0.3$                 | -7.3                           |
| XIAP-BIR1/5b      |  | $56.2 \pm 0.3$                 | -7.3                           |
| XIAP-BIR1/6       |  | $60.5 \pm 0.1$                 | -3.0                           |
| XIAP-BIR1/7       |  | $60.5 \pm 0.2$                 | -3.0                           |
| XIAP-BIR1/9       |  | $62.5 \pm 1.5$                 | -1.0                           |
| XIAP-BIR1/10      |  | $61.2 \pm 0.6$                 | -2.3                           |
| XIAP-BIR1/NAF2    |  | $61.0 \pm 0.3$                 | -2.5                           |

<sup>a</sup> $\Delta T_m$  is calculated as the difference from the apoprotein melting temperature.

Thermal shift assays to monitor unfolding of 80  $\mu$ M XIAP-BIR1 (~1 mg/ml) upon incubation with 1.0 mM of each compound were conducted in a MiniOpticon Real-Time PCR Detection System (Bio-Rad). The fluorescent dye Sypro Orange was used to monitor protein unfolding. The sample plates were heated from 15 to 95  $^{\circ}$ C, with a heating rate of 0.5  $^{\circ}$ C/5 sec. Fluorescence intensity was measured within the excitation/emission ranges 470–505/540–700 nm. All the experiments were performed in triplicate, to calculate average  $T_M$  values and associated standard errors. Suramin ( $\Delta T_m$  of about  $-13.5^{\circ}$ C), NF023 and its analogs **5a** and **5b** ( $\Delta T_m$  of about  $-7^{\circ}$ C), and compounds **6** and **7** ( $\Delta T_m$  of about  $-3^{\circ}$ C) caused a significant effect on the protein conformational stability.

**Figure S1. The V86E mutation is compatible with NF023 predicted binding.** The structure of XIAP-BIR1 V86E mutant (in magenta) superimposed to XIAP-BIR1/NF023 docking prediction (light blue cartoons and green sticks) reveals that the steric hindrance of E86 side chain is fairly compatible with NF023 predicted binding, as confirmed by MST experiments, where the measured affinity of NF023 vs XIAP-BIR1 V86E is not drastically affected compared to the value observed vs the wild type protein domain.

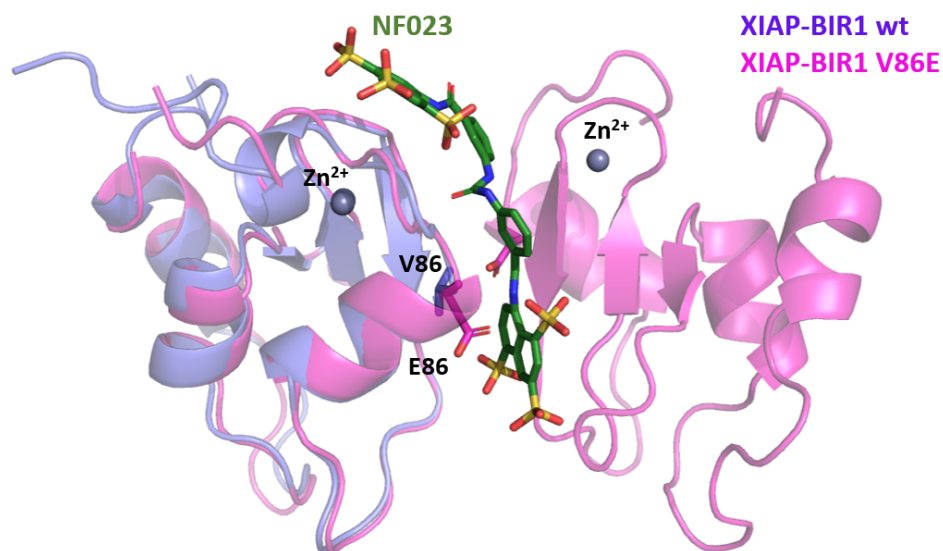

Supplement: OPEN-8-476-s001.pdf [file OPEN-8-476-s001.pdf]
